# Supplementary material for: Ba2Ga2F6(IO3)(PO4): the first fluoride-containing iodate-phosphate with a 1D [Ga2F6(IO3)(PO4)]4− helix chain
Source: Royal Society of Chemistry journal article supplement (doi:10.1039/d3dt04343f), 2024-01-01
Supplement: d3dt04343f1.pdf [file d3dt04343f1.pdf]

$\text{Ba}_2\text{Ga}_2\text{F}_6(\text{IO}_3)(\text{PO}_4)$ : First fluoride-containing iodate-phosphate with 1D  $[\text{Ga}_2\text{F}_6(\text{IO}_3)(\text{PO}_4)]^{4-}$  helix chain

Miao-Bin Xu,<sup>a</sup> Jia-Jia Li,<sup>a</sup> Huai-Yu Wu,<sup>a</sup> Nan-Ma,<sup>a,b</sup> Ning-Yu,<sup>a</sup> Mo-Fan Zhuo,<sup>a</sup> Jin Chen<sup>a,b\*</sup> and Ke-Zhao Du<sup>a\*</sup>

a: College of Chemistry and Materials Science, Fujian Normal University, Fuzhou, 350002 China. Email: [cj2015@fjnu.edu.cn](mailto:cj2015@fjnu.edu.cn) and [duke@fjnu.edu.cn](mailto:duke@fjnu.edu.cn)

b: State Key Laboratory of Structural Chemistry, Fujian Institute of Research on the Structure of Matter, Chinese Academy of Sciences, Fuzhou, 350002, P. R. China.

**Table S1.** Fractional Atomic Coordinates ( $\times 10^4$ ) and Equivalent Isotropic Displacement Parameters ( $\text{\AA}^2 \times 10^3$ ) for  $\text{Ba}_2\text{Ga}_2\text{F}_6(\text{IO}_3)(\text{PO}_4)$ .

| Atom | x          | y          | z          | U(eq)     |
|------|------------|------------|------------|-----------|
| Ba1  | 2176.6(9)  | 1149.5(2)  | 5374.5(5)  | 14.47(16) |
| Ba2  | 7703.2(9)  | 2763.4(2)  | 3435.6(5)  | 12.31(16) |
| Ga1  | 2483.3(16) | 5336.0(4)  | 6970.6(10) | 9.7(2)    |
| Ga2  | 2417.7(16) | 2856.3(4)  | 6258.3(9)  | 9.8(2)    |
| I1   | 7531.6(10) | 4381.3(2)  | 7727.7(6)  | 12.93(17) |
| P1   | 2783(4)    | 4191.2(9)  | 4728(2)    | 8.7(5)    |
| O1   | 6977(11)   | 3900(3)    | 9160(6)    | 19.0(14)  |
| O2   | 10528(10)  | 4772(2)    | 8332(6)    | 13.9(13)  |
| O3   | 5423(10)   | 5094(2)    | 8168(6)    | 12.1(13)  |
| O4   | 5378(10)   | 4074(2)    | 4061(6)    | 12.2(13)  |
| O5   | 1439(10)   | 3525(2)    | 4993(6)    | 13.0(13)  |
| O6   | 965(10)    | 4615(2)    | 3863(6)    | 12.4(13)  |
| O7   | 3324(10)   | 4552(2)    | 6023(6)    | 12.8(13)  |
| F1   | 776(9)     | 3291(2)    | 7680(5)    | 18.5(11)  |
| F2   | 5554(9)    | 3211(2)    | 6793(5)    | 18.3(12)  |
| F3   | 2994(9)    | 2071(2)    | 7335(5)    | 16.9(11)  |
| F4   | -601(9)    | 2358.8(19) | 5783(5)    | 14.3(11)  |
| F5   | 4010(9)    | 2344(2)    | 4929(5)    | 16.9(11)  |
| F6   | 1837(9)    | 6085(2)    | 8003(5)    | 17.5(11)  |

**Table S2.** Selected bond distances ( $\text{\AA}$ ) and calculated bond valences for  $\text{Ba}_2\text{Ga}_2\text{F}_6(\text{IO}_3)(\text{PO}_4)$ .

| Bond                | Bond Distance | BV    | BVS   |
|---------------------|---------------|-------|-------|
| Ba1-O1 <sup>2</sup> | 2.933(6)      | 0.174 | 1.940 |
| Ba1-O1 <sup>3</sup> | 2.790(6)      | 0.255 |       |
| Ba1-O2 <sup>2</sup> | 2.892(5)      | 0.194 |       |
| Ba1-O3 <sup>4</sup> | 2.841(5)      | 0.223 |       |
| Ba1-F1 <sup>3</sup> | 3.046(5)      | 0.098 |       |
| Ba1-F3              | 2.741(5)      | 0.224 |       |
| Ba1-F4              | 2.831(4)      | 0.176 |       |
| Ba1-F5              | 2.597(4)      | 0.331 |       |
| Ba1-F6 <sup>5</sup> | 2.679(5)      | 0.265 |       |
| Ba2-O4              | 2.941(5)      | 0.170 | 2.217 |
| Ba2-O5 <sup>7</sup> | 2.900(5)      | 0.190 |       |
| Ba2-F1 <sup>6</sup> | 2.746(5)      | 0.221 |       |
| Ba2-F2 <sup>3</sup> | 2.779(4)      | 0.263 |       |
| Ba2-F3 <sup>3</sup> | 2.676(4)      | 0.267 |       |
| Ba2-F3 <sup>6</sup> | 2.988(5)      | 0.115 |       |
| Ba2-F4 <sup>7</sup> | 2.663(5)      | 0.277 |       |
| Ba2-F4 <sup>6</sup> | 2.877(5)      | 0.155 |       |
| Ba2-F5              | 2.600(5)      | 0.328 |       |
| Ba2-F6 <sup>8</sup> | 2.731(5)      | 0.230 |       |
| Ga1-O2 <sup>1</sup> | 2.065(6)      | 0.404 | 3.188 |
| Ga1-O3              | 1.988(5)      | 0.498 |       |
| Ga1-O4 <sup>8</sup> | 1.935(6)      | 0.575 |       |
| Ga1-O6 <sup>9</sup> | 1.959(5)      | 0.539 |       |

|        |          |       |       |
|--------|----------|-------|-------|
| Ga1-O7 | 1.890(5) | 0.649 |       |
| Ga1-F6 | 1.859(5) | 0.524 |       |
| Ga2-O5 | 1.915(5) | 0.607 | 3.006 |
| Ga2-F1 | 1.904(5) | 0.464 |       |
| Ga2-F2 | 1.836(4) | 0.558 |       |
| Ga2-F3 | 1.930(4) | 0.433 |       |
| Ga2-F4 | 1.898(4) | 0.472 |       |
| Ga2-F5 | 1.897(5) | 0.473 |       |
| I1-O1  | 1.777(6) | 1.842 | 4.993 |
| I1-O2  | 1.825(5) | 1.618 |       |
| I1-O3  | 1.845(5) | 1.533 |       |
| P1-O4  | 1.531(6) | 1.262 | 5.109 |
| P1-O5  | 1.520(6) | 1.300 |       |
| P1-O6  | 1.528(5) | 1.272 |       |
| P1-O7  | 1.527(6) | 1.275 |       |

Symmetry transformations used to generate equivalent atoms:

<sup>1</sup> 1/2+X, 3/2-Y, 1/2-Z; <sup>2</sup> 1/2+X, +Y, 1/2-Z; <sup>3</sup> +X, 3/2-Y, +Z; <sup>4</sup> 1/2-X, 1/2+Y, -1/2+Z; <sup>5</sup> 1/2-X, 1-Y, -1/2+Z; <sup>6</sup> -1/2+X, +Y, 1/2-Z; <sup>7</sup> -1/2+X, 3/2-Y, 1/2-Z; <sup>8</sup> 1-X, 1-Y, 1-Z; <sup>9</sup> +X, 1/2-Y, +Z.

**Table S3.** The assignments of the infrared absorption peaks for Ba<sub>2</sub>Ga<sub>2</sub>F<sub>6</sub>(IO<sub>3</sub>)(PO<sub>4</sub>).

|      | Wavelength (cm <sup>-1</sup> ) |
|------|--------------------------------|
| I-O  | 818, 641, 538, 455, 429        |
| P-O  | 1030, 999, 612, 570, 511, 492  |
| Ga-F | 1114, 1074                     |
| Ga-O | 774, 702                       |

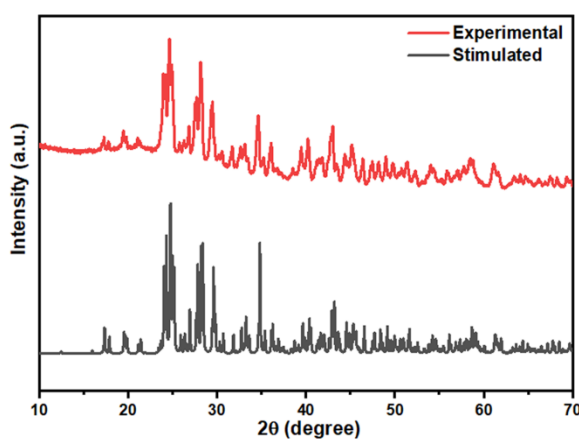

**Figure S1.** Simulated and measured powder X-ray diffraction patterns for Ba<sub>2</sub>Ga<sub>2</sub>F<sub>6</sub>(IO<sub>3</sub>)(PO<sub>4</sub>)

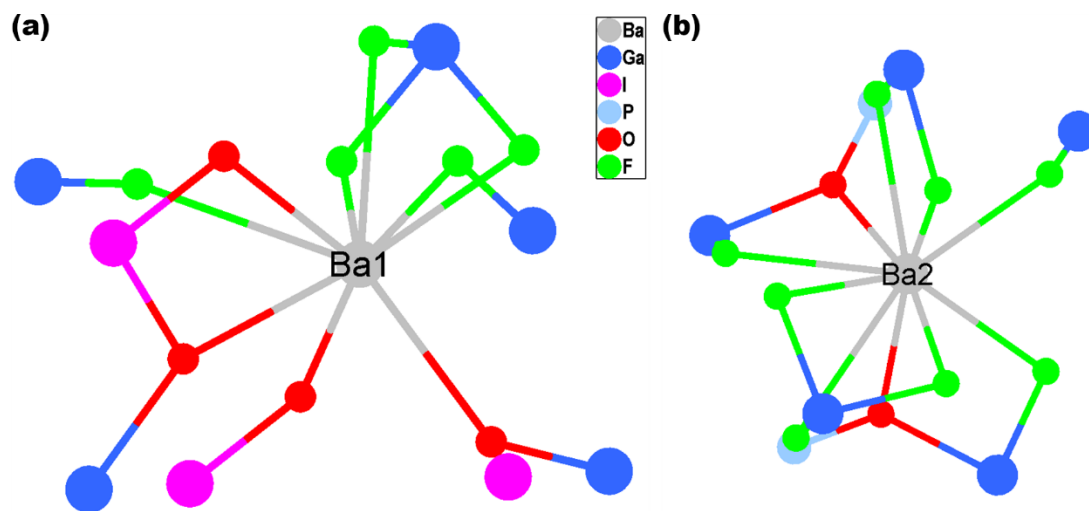

**Figure S2.** Views of the coordination geometries of Ba(1) and Ba(2)

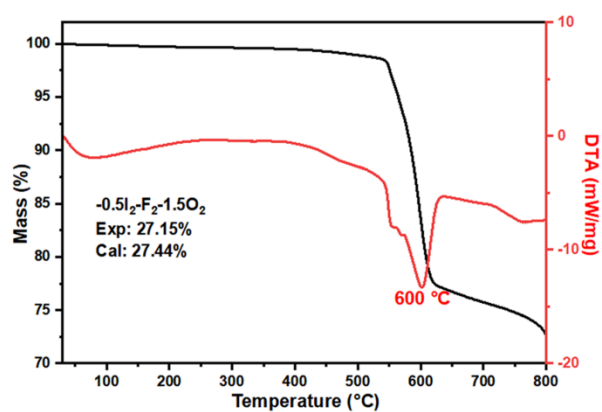

**Figure S3.** TG-DTA curves for Ba<sub>2</sub>Ga<sub>2</sub>F<sub>6</sub>(IO<sub>3</sub>)(PO<sub>4</sub>).

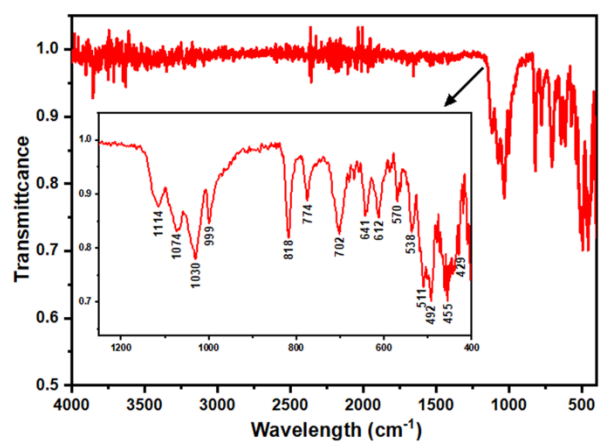

**Figure S4.** IR spectra for Ba<sub>2</sub>Ga<sub>2</sub>F<sub>6</sub>(IO<sub>3</sub>)(PO<sub>4</sub>).

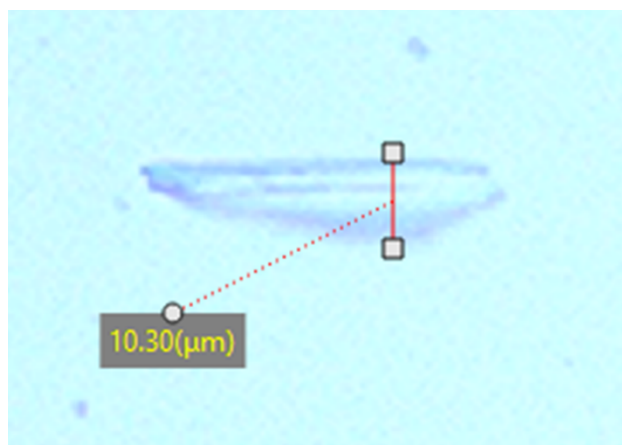

**Figure S5.** The thickness of Ba<sub>2</sub>Ga<sub>2</sub>F<sub>6</sub>(IO<sub>3</sub>)(PO<sub>4</sub>) crystal used for birefringence measurements

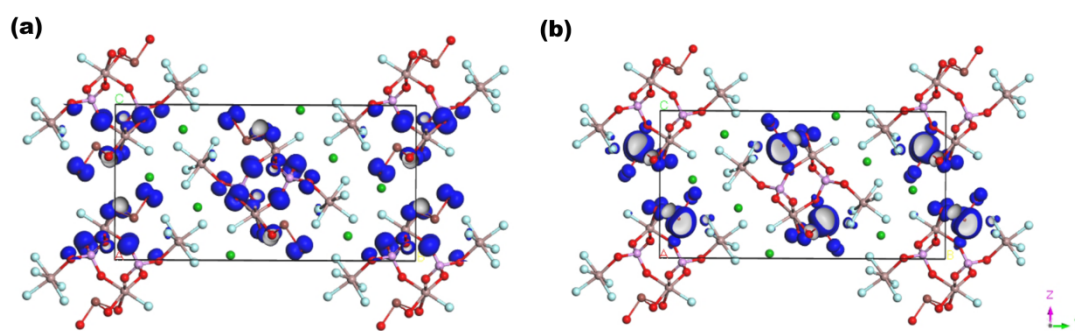

**Figure S6.** HOMO (a) and LUMO (b) of Ba<sub>2</sub>Ga<sub>2</sub>F<sub>6</sub>(IO<sub>3</sub>)(PO<sub>4</sub>)
